# Supplementary material for: Topology-Based Three-Dimensional Reconstruction of Delicate Skeletal Fossil Remains and the Quantification of Their Taphonomic Deformation
Source: Frontiers journal article supplement (doi:10.3389/fevo.2022.828006), 2022-03-24
Supplement: Data_Sheet_1.zip [file Data_Sheet_1.zip]

## SUPPLEMENTARY MATERIAL

for

### Topology-based three-dimensional reconstruction of delicate skeletal fossil remains and the quantification of their taphonomic deformation

Oliver E. Demuth<sup>1,2,3,\*</sup>, Juan Benito<sup>1,4</sup>, Emanuel Tschopp<sup>5,6,7</sup>, Stephan Lautenschlager<sup>8</sup>, Heinrich Mallison<sup>5,9</sup>, Niklaus Heeb<sup>3</sup>, Daniel J. Field<sup>1,10</sup>

<sup>1</sup> Department of Earth Sciences, University of Cambridge, Cambridge, UK

<sup>2</sup> Structure and Motion Laboratory, Royal Veterinary College, Hatfield, UK

<sup>3</sup> Department Design, Zurich University of the Arts, Zurich, Switzerland

<sup>4</sup> Department of Biology & Biochemistry, Milner Centre for Evolution, University of Bath, Bath, UK

<sup>5</sup> Universität Hamburg, Hamburg, Germany

<sup>6</sup> Division of Paleontology, American Museum of Natural History, New York, USA

<sup>7</sup> GeoBioTec, NOVA School of Science and Technology, Caparica, Portugal

<sup>8</sup> School of Geography, Earth and Environmental Sciences, University of Birmingham, Birmingham, UK

<sup>9</sup> Palaeo3D, Rain am Lech, Germany

<sup>10</sup> Museum of Zoology, University of Cambridge, Cambridge, UK

**\* Correspondence:**

Oliver E. Demuth  
oed24@cam.ac.uk

## 1 Supplementary Figures

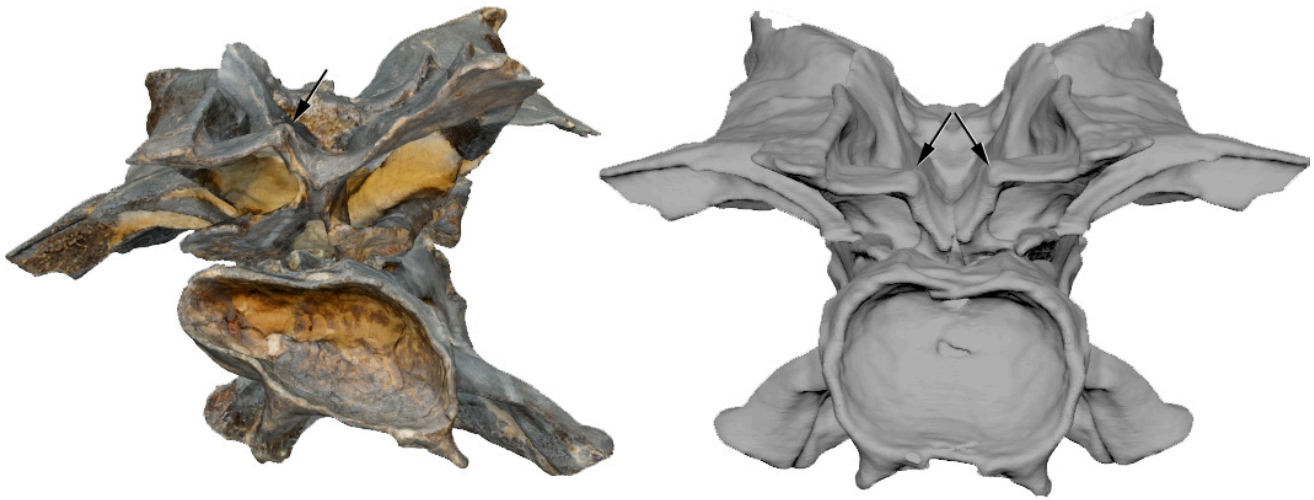

**Supplementary Figure S1.** Deformed and semi-automated reconstruction of *Galeamopus* SMA 0011/NMZ 1000011 CV 8 in caudal view. The semi-automated reconstruction approach following Lautenschlager (2016) resulted in only partial retrodeformation. Although the retrodeformed vertebra is fully symmetrical, deformation artefacts are still present (e.g., folded postzygapophyses, see arrows), indicating that further manual reconstruction would be required and that automated methods are not universally applicable.

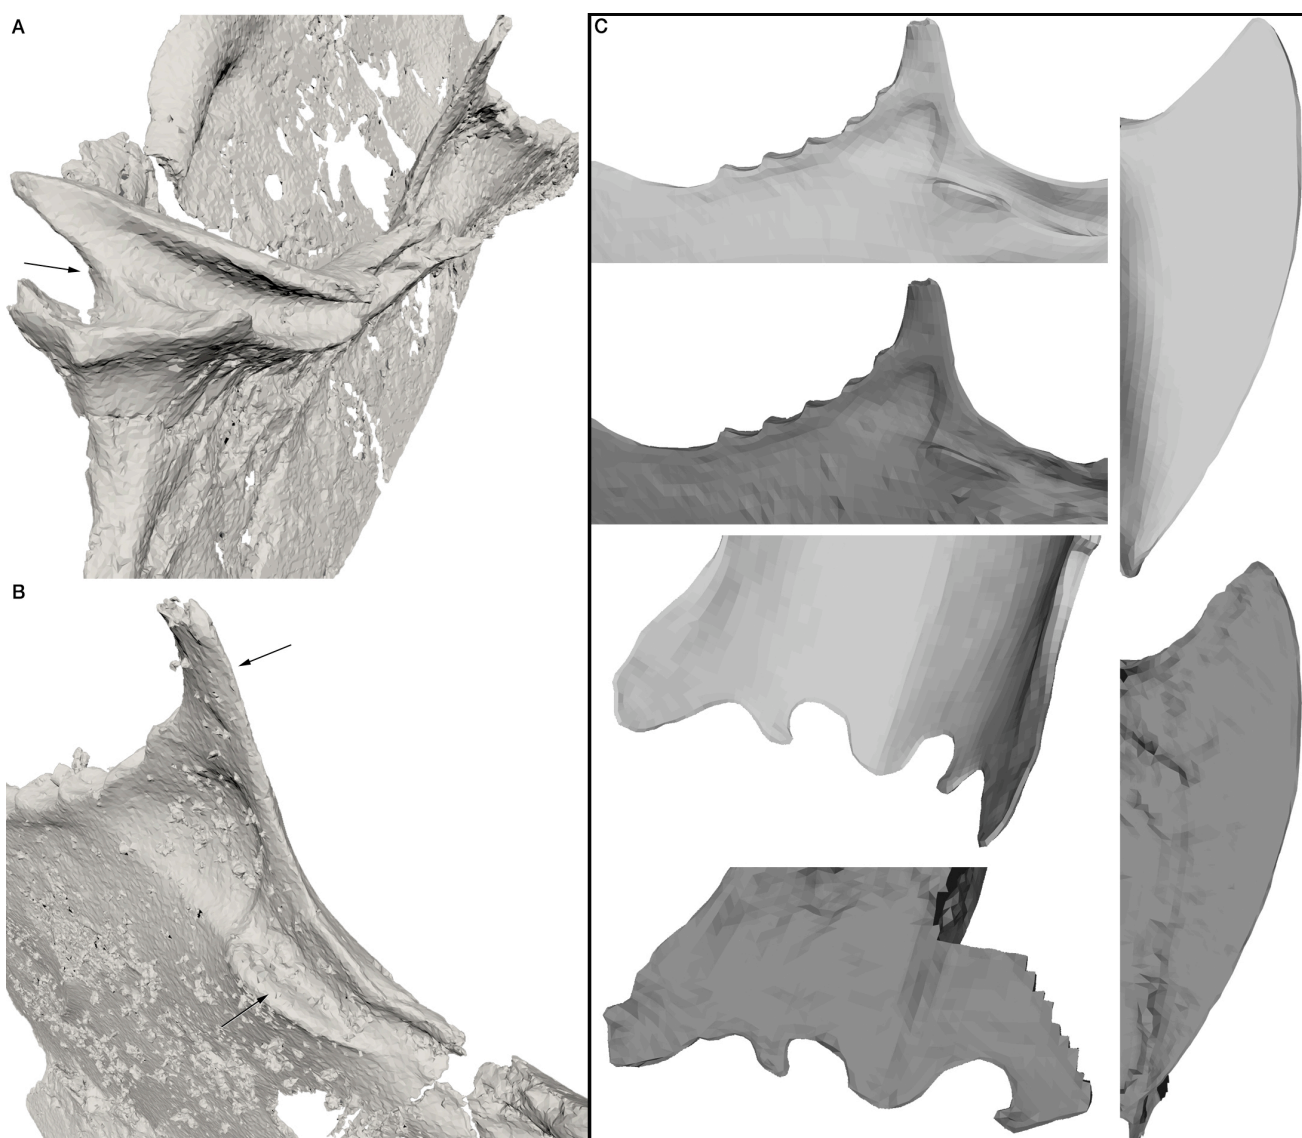

**Supplementary Figure S2.** Well-preserved parts in the *Ichthyornis* specimens. (A) Crossed coracoid sulci of FHSM VP-18702. (B) Craniolateral process and ventral lip of NHMUK PV A 905 (arrows). (C) Comparison between reconstruction (light grey) and retopologised (dark grey) well-preserved parts of the individual specimens.

## 2 Supplementary Tables

**Supplementary Table S1.** All digital elements from this study and where to find them.

| Specimen    | Taxon                    | Element                                  | Step                                    | DOI                                                                   |
|-------------|--------------------------|------------------------------------------|-----------------------------------------|-----------------------------------------------------------------------|
| NMZ 1000011 | <i>Galeamopus pabsti</i> | Cervical vertebra 1 (atlas)              | Original photogrammetry mesh            | <a href="https://doi.org/10.17602/M2/M412553">10.17602/M2/M412553</a> |
| NMZ 1000011 | <i>Galeamopus pabsti</i> | Cervical vertebra 2 (axis)               | Original photogrammetry mesh            | <a href="https://doi.org/10.17602/M2/M412580">10.17602/M2/M412580</a> |
| NMZ 1000011 | <i>Galeamopus pabsti</i> | Cervical vertebra 3                      | Original photogrammetry mesh            | <a href="https://doi.org/10.17602/M2/M414476">10.17602/M2/M414476</a> |
| NMZ 1000011 | <i>Galeamopus pabsti</i> | Cervical vertebra 4                      | Original photogrammetry mesh            | <a href="https://doi.org/10.17602/M2/M414482">10.17602/M2/M414482</a> |
| NMZ 1000011 | <i>Galeamopus pabsti</i> | Cervical vertebra 5                      | Original photogrammetry mesh            | <a href="https://doi.org/10.17602/M2/M414490">10.17602/M2/M414490</a> |
| NMZ 1000011 | <i>Galeamopus pabsti</i> | Cervical vertebra 6                      | Original photogrammetry mesh            | <a href="https://doi.org/10.17602/M2/M414493">10.17602/M2/M414493</a> |
| NMZ 1000011 | <i>Galeamopus pabsti</i> | Cervical vertebra 7 (neural arch)        | Original photogrammetry mesh            | <a href="https://doi.org/10.17602/M2/M414499">10.17602/M2/M414499</a> |
| NMZ 1000011 | <i>Galeamopus pabsti</i> | Cervical vertebra 7 (centrum)            | Original photogrammetry mesh            | <a href="https://doi.org/10.17602/M2/M414502">10.17602/M2/M414502</a> |
| NMZ 1000011 | <i>Galeamopus pabsti</i> | Cervical vertebra 8 (neural arch)        | Original photogrammetry mesh            | <a href="https://doi.org/10.17602/M2/M414505">10.17602/M2/M414505</a> |
| NMZ 1000011 | <i>Galeamopus pabsti</i> | Cervical vertebra 8 (neural arch)        | Retopologised mesh                      | <a href="https://doi.org/10.17602/M2/M414546">10.17602/M2/M414546</a> |
| NMZ 1000011 | <i>Galeamopus pabsti</i> | Cervical vertebra 8 (neural arch)        | Retrodeformed mesh                      | <a href="https://doi.org/10.17602/M2/M414549">10.17602/M2/M414549</a> |
| NMZ 1000011 | <i>Galeamopus pabsti</i> | Cervical vertebra 8 (centrum)            | Original photogrammetry mesh            | <a href="https://doi.org/10.17602/M2/M414511">10.17602/M2/M414511</a> |
| NMZ 1000011 | <i>Galeamopus pabsti</i> | Cervical vertebra 8 (centrum)            | Retopologised mesh                      | <a href="https://doi.org/10.17602/M2/M414552">10.17602/M2/M414552</a> |
| NMZ 1000011 | <i>Galeamopus pabsti</i> | Cervical vertebra 8 (centrum)            | Retrodeformed mesh                      | <a href="https://doi.org/10.17602/M2/M414555">10.17602/M2/M414555</a> |
| NMZ 1000011 | <i>Galeamopus pabsti</i> | Cervical vertebra 8 (composite)          | Merged automatically retrodeformed mesh | <a href="https://doi.org/10.17602/M2/M414542">10.17602/M2/M414542</a> |
| NMZ 1000011 | <i>Galeamopus pabsti</i> | Cervical vertebra 8 (prototype)          | Prototype                               | <a href="https://doi.org/10.17602/M2/M414574">10.17602/M2/M414574</a> |
| NMZ 1000011 | <i>Galeamopus pabsti</i> | Cervical vertebrae 9 & 10                | Original photogrammetry mesh            | <a href="https://doi.org/10.17602/M2/M414528">10.17602/M2/M414528</a> |
| NMZ 1000011 | <i>Galeamopus pabsti</i> | Cervical vertebra 9                      | Retopologised mesh                      | <a href="https://doi.org/10.17602/M2/M414558">10.17602/M2/M414558</a> |
| NMZ 1000011 | <i>Galeamopus pabsti</i> | Cervical vertebra 9                      | Retrodeformed mesh                      | <a href="https://doi.org/10.17602/M2/M414561">10.17602/M2/M414561</a> |
| NMZ 1000011 | <i>Galeamopus pabsti</i> | Cervical vertebra 9                      | Prototype                               | <a href="https://doi.org/10.17602/M2/M414577">10.17602/M2/M414577</a> |
| NMZ 1000011 | <i>Galeamopus pabsti</i> | Cervical vertebra 10                     | Retopologised mesh                      | <a href="https://doi.org/10.17602/M2/M414564">10.17602/M2/M414564</a> |
| NMZ 1000011 | <i>Galeamopus pabsti</i> | Cervical vertebra 10                     | Retrodeformed mesh                      | <a href="https://doi.org/10.17602/M2/M414567">10.17602/M2/M414567</a> |
| NMZ 1000011 | <i>Galeamopus pabsti</i> | Cervical vertebra 10                     | Prototype                               | <a href="https://doi.org/10.17602/M2/M414580">10.17602/M2/M414580</a> |
| NMZ 1000011 | <i>Galeamopus pabsti</i> | Cervical vertebra 12 & dorsal vertebra 1 | Original photogrammetry mesh            | <a href="https://doi.org/10.17602/M2/M414539">10.17602/M2/M414539</a> |

**Supplementary Table S1.** (continued).

| Specimen      | Taxon                     | Element | Step               | DOI                                                                   |
|---------------|---------------------------|---------|--------------------|-----------------------------------------------------------------------|
| FHSM VP 18702 | <i>Ichthyornis dispar</i> | Sternum | Original CT mesh   | <a href="https://doi.org/10.17602/M2/M399358">10.17602/M2/M399358</a> |
| FHSM VP 18702 | <i>Ichthyornis dispar</i> | Sternum | Retopologised mesh | <a href="https://doi.org/10.17602/M2/M414671">10.17602/M2/M414671</a> |
| FHSM VP 18702 | <i>Ichthyornis dispar</i> | Sternum | Retrodeformed mesh | <a href="https://doi.org/10.17602/M2/M411923">10.17602/M2/M411923</a> |
| KUVP 1189673  | <i>Ichthyornis dispar</i> | Sternum | Original CT mesh   | <a href="https://doi.org/10.17602/M2/M406297">10.17602/M2/M406297</a> |
| KUVP 1189673  | <i>Ichthyornis dispar</i> | Sternum | Retopologised mesh | <a href="https://doi.org/10.17602/M2/M414682">10.17602/M2/M414682</a> |
| KUVP 1189673  | <i>Ichthyornis dispar</i> | Sternum | Retrodeformed mesh | <a href="https://doi.org/10.17602/M2/M411926">10.17602/M2/M411926</a> |
| NHMuK A 905   | <i>Ichthyornis dispar</i> | Sternum | Original CT mesh   | <a href="https://doi.org/10.17602/M2/M406247">10.17602/M2/M406247</a> |
| NHMuK A 905   | <i>Ichthyornis dispar</i> | Sternum | Retopologised mesh | <a href="https://doi.org/10.17602/M2/M414674">10.17602/M2/M414674</a> |
| NHMuK A 905   | <i>Ichthyornis dispar</i> | Sternum | Retrodeformed mesh | <a href="https://doi.org/10.17602/M2/M411932">10.17602/M2/M411932</a> |
| -             | <i>Ichthyornis dispar</i> | Sternum | Prototype          | <a href="https://doi.org/10.17602/M2/M414595">10.17602/M2/M414595</a> |

**Supplementary Table S2.**  $\mu$ CT scan settings and scan resolutions for the *Ichthyornis* sterna.

| Specimen              | Voltage (kV) | Current ( $\mu$ A) | Voxel size (mm) | Number of slices |
|-----------------------|--------------|--------------------|-----------------|------------------|
| <b>FHSM VP-18702</b>  | 170          | 225                | 0.058           | 1727             |
| <b>KUVP 119673</b>    | 200          | 140                | 0.0643          | 1758             |
| <b>NHMuK PV A 905</b> | 155          | 260                | 0.0363          | 1764             |

**Supplementary Table S3.** *Galeamopus* retopology properties.

| Specimen                                    | Vertices | Quadrilateral faces | Triangles | Median global deformation [cm] | Median local deformation [degrees] |
|---------------------------------------------|----------|---------------------|-----------|--------------------------------|------------------------------------|
| <b>SMA 0011/NMZ 1000011 CV8 centrum</b>     | 3365     | 3261                | 6522      | 1.875                          | 22.866                             |
| <b>Reconstruction CV8 centrum</b>           | 3484     | 3482                | 6964      | -                              | -                                  |
| <b>SMA 0011/NMZ 1000011 CV8 neural arch</b> | 7213     | 6830                | 13660     | 1.606                          | 20.815                             |
| <b>Reconstruction CV8 neural arch</b>       | 8840     | 8842                | 17684     | -                              | -                                  |
| <b>SMA 0011/NMZ 1000011 CV9</b>             | 7391     | 7189                | 14378     | 1.280                          | 12.122                             |
| <b>Reconstruction CV9</b>                   | 12172    | 12176               | 23352     | -                              | -                                  |
| <b>SMA 0011/NMZ 1000011 CV10</b>            | 7679     | 7427                | 14854     | 1.622                          | 13.980                             |
| <b>Reconstruction CV10</b>                  | 12660    | 12664               | 22884     | -                              | -                                  |

**Supplementary Table S4.** *Ichthyornis* retopology properties.

| Specimen              | Vertices | Quadrilateral faces | Triangles | Median global deformation [cm] | Median local deformation [degrees] |
|-----------------------|----------|---------------------|-----------|--------------------------------|------------------------------------|
| <b>FHSM VP-18702</b>  | 10836    | 10646               | 21292     | 0.592                          | 25.807                             |
| <b>KUVP 119673</b>    | 7949     | 7832                | 15664     | 0.441                          | 22.080                             |
| <b>NHMUK PV A 905</b> | 6748     | 13220               | 6610      | 0.250                          | 15.491                             |
| <b>Reconstruction</b> | 11444    | 11442               | 22884     | -                              | -                                  |

### 3 Supplementary Code

**Supplementary Code S1.** MAYA Embedded Language (MEL) script for visualisation of CSV data as vertex colours.

```
/* Vertex attribute color

This script applies color based on a data file (.csv) to an object's vertices, i.e. it
generates and applies a heat map. The colormap is loaded from another CSV file. Both
the data and colormap csv files need to be in the same folder specified in this script.
Select the mesh and run script.

Written by Oliver Demuth 22.01.2020
Last updated 01.12.2021 - Oliver Demuth

Note the number of vertices must match the number of rows of the input data file. Make
sure to have vertex colors on: Mesh Display > Toggle Display Colors Attribute

*/

//=====//

/***** SET VARIABLE NAMES BELOW *****/

string $array[] = `ls -sl`; //select two objects to compare
string $impPath = ("YOUR/FILE/PATH"); // set file path where the colormaps and data are saved
string $nc = "COLORMAP"; // name of colormap; change as appropriate, e.g. "parula", "jet",
"hot", etc. based on your predefined colormaps in your folder (without '.csv' suffix)
string $DATA = "DATAFILE"; // name of data file (without '.csv' suffix)
int $setRefSpace = 0; // set reference space (0 = world space, 1 = object space)

//=====//

/***** NO CHANGES NEEDED BELOW *****/

// check if one object is selected, otherwise issue error //
int $selArraysSize = size($array);

string $impFile2 = ($impPath + $DATA + ".csv");
string $impData2[] = `fileread($impFile2)`; // load data CSV file
int $DataSize = size($impData2); //count # rows of input CSV

string $ErrorString1 = "No objects selected. Cannot perform vertex distance color transformation.
Please select a mesh.";
string $ErrorString2 = "Too many objects selected. Cannot perform vertex distance color
transformation. Please select only one mesh.";

if ($selArraysSize == 0) {
    select -cl;
    error $ErrorString1;
}

if ($selArraysSize > 1) {
    select -cl;
    error $ErrorString2;
}

// check if object's vertex count matches # rows of data, otherwise issue error //
int $numbVerts[] = `polyEvaluate -v $array[0]`; // count number of vertices
```

```

int $numbV[];

$numbV[0] = $numbVerts[0];
$numbVDiff = $numbV[0] - $DataSize;

string $ErrorString3 = "The number of vertices of target " + $array[0] + "Shape does not match
the size of " + $DATA + ".csv. Cannot perform vertex distance color transformation. Please check
input data.";
if ($numbVDiff != 0) {
    select -cl;
    error $ErrorString3;
}

// if checks passed execute script //

if ($setRefSpace < 0) $setRefSpace = 0;    //check reference space inputs
if ($setRefSpace > 0) $setRefSpace = 1;

string $refSpace[];    // set reference space
$refSpace[0] = "-ws";
$refSpace[1] = "-os";

string $impFile = ($impPath + $nc + ".csv");
string $impData[] = `fileread($impFile)`;    // load colormap CSV file
int $colorSize = size($impData);    //count # rows of input CSV

string $t[];
vector $colorVec[];
float $colorMap[];

int $k = 0;
for ($k = 0;$k<$colorSize;$k++)    // goes through CSV and reads data points into array
{
    tokenizeList($impData[$k], $t);

    $colorMap[0] = $t[0];
    $colorMap[1] = $t[1];
    $colorMap[2] = $t[2];

    $colorVec[$k] = << $colorMap[0], $colorMap[1], $colorMap[2]>>; // represents CSV as vector
array
}

string $u[];
float $NormArray[];

float $global_max = 0.0001;

int $m = 0;
for ($m = 0;$m<$DataSize;$m++)    // goes through CSV and reads data points into array
{
    tokenizeList($impData2[$m], $u);

    $NormArray[$m] = $u[0];

    if ($NormArray[$m] >= $global_max)    // set $global_max to the maximum of the input data
        $global_max = $NormArray[$m];
}

float $colorNorm = $colorSize / $global_max; // normalize colorscale based on $global_max

// set progressBar

progressBar -edit
    -beginProgress
    -isInterruptable true
    -status "Set Vertex Colours"
    -maxValue $numbVerts[0]
    $gMainProgressBar;

int $j = 0;
for($j; $j < $numbVerts[0]; $j++)    // go through each vertex individually

```



```

{
    float $rowfloat = $NormArray[$j] * $colorNorm * (1/(float)$colorSize * ($colorSize - 1));
    // put vertex into colormap bin
    $rowfloat = python('%%.0f' % "$rowfloat");

    int $row = $rowfloat;
    if ($row > $colorSize -1)    // if maximum is manually set instead of $global_max, restrict
possible bins to actual bins
        $row = $colorSize -1;

    vector $colorRow = $colorVec[$row];    // temporary vector to extract vector components

    float $R = $colorRow.x;
    float $G = $colorRow.y;
    float $B = $colorRow.z;

    select -r ($array[0] + ".vtx["+ $j +"]");    // select individual vertex
    polyColorPerVertex -rgb $R $G $B;    // paint vertex color
    select -cl;

    progressBar -edit
    -status "Set Vertex Colours"
    -step $j $gMainProgressBar;
}

progressBar -edit
-endProgress

```

## 4 Supplementary References

Lautenschlager, S. (2016). Reconstructing the past: methods and techniques for the digital restoration of fossils. *Royal Society Open Science*, 3(10), 160342. <https://doi.org/10.1098/rsos.160342>
